# Supplementary material for: One-pot scalable synthesis of Cu–CuFe2O4/graphene composites as anode materials for lithium-ion batteries with enhanced lithium storage properties
Source: Royal Society of Chemistry journal article supplement (doi:10.1039/c4ta02203c), 2014-06-13
Supplement: c4ta02203c1.pdf [file c4ta02203c1.pdf]

Electronic Supplementary Information (ESI) for

**One-pot scalable synthesis of Cu-CuFe<sub>2</sub>O<sub>4</sub>/graphene composites as anode material of lithium-ion batteries with enhanced lithium storage properties**

Yucheng Dong,<sup>a,b\*</sup> Ying-San Chui,<sup>a,b</sup> Ruguang Ma,<sup>c</sup> Chenwei Cao,<sup>b</sup> Hua Cheng,<sup>b</sup> Yang Yang Li,<sup>b</sup>  
Juan Antonio Zapien<sup>a,b\*</sup>

<sup>a</sup>*Center of super-Diamond and Advanced Films (COSDAF), City University of Hong Kong, Hong Kong*

<sup>b</sup>*Department of Physics and Materials Science, City University of Hong Kong, 83 Tat Chee Avenue, Kowloon, Hong Kong SAR, PR China*

<sup>c</sup>*School of Chemical & Biomedical Engineering, Nanyang Technological University, 62 Nanyang Drive, Singapore 637459*

\* E-mail: [yc-d@hotmail.com](mailto:yc-d@hotmail.com), [apjazzs@cityu.edu.hk](mailto:apjazzs@cityu.edu.hk)

### Preparation of CuFe<sub>2</sub>O<sub>4</sub>/G composites

A certain amount of Cu-CuFe<sub>2</sub>O<sub>4</sub>/graphene composites was added into deionized water under sonication to form colloidal suspension, and then FeCl<sub>3</sub> was dissolved into the resultant suspension under mechanical stirring for several hours. The color of the solution became light green due to the presence of FeCl<sub>2</sub> and CuCl<sub>2</sub>. The metallic Cu was dissolved by the following reaction:

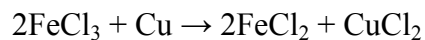

After washing several times by alcohol and deionized water, the residual powder was collected by centrifugation and dried in oven at 60 °C for 12 h.

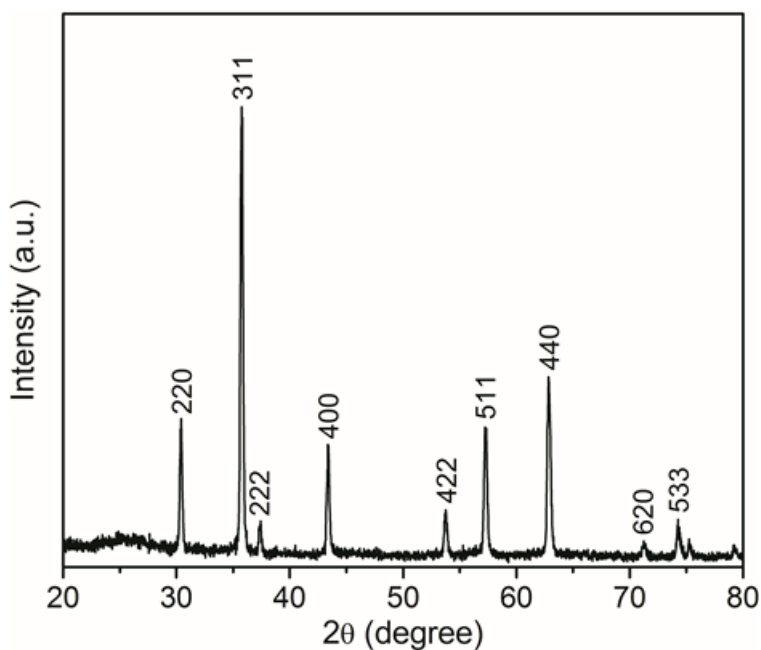

Fig. S1 XRD pattern of FeCl<sub>3</sub> treated Cu-CuFe<sub>2</sub>O<sub>4</sub>/G composites, all the diffraction peaks and relative intensity are consistent with those cubic phase of CuFe<sub>2</sub>O<sub>4</sub> (PDF, 01-077-0010), which confirmed the nonexistence of metallic Cu in the FeCl<sub>3</sub> treated Cu-CuFe<sub>2</sub>O<sub>4</sub>/G composites and the good crystallinity of CuFe<sub>2</sub>O<sub>4</sub>/G composites.

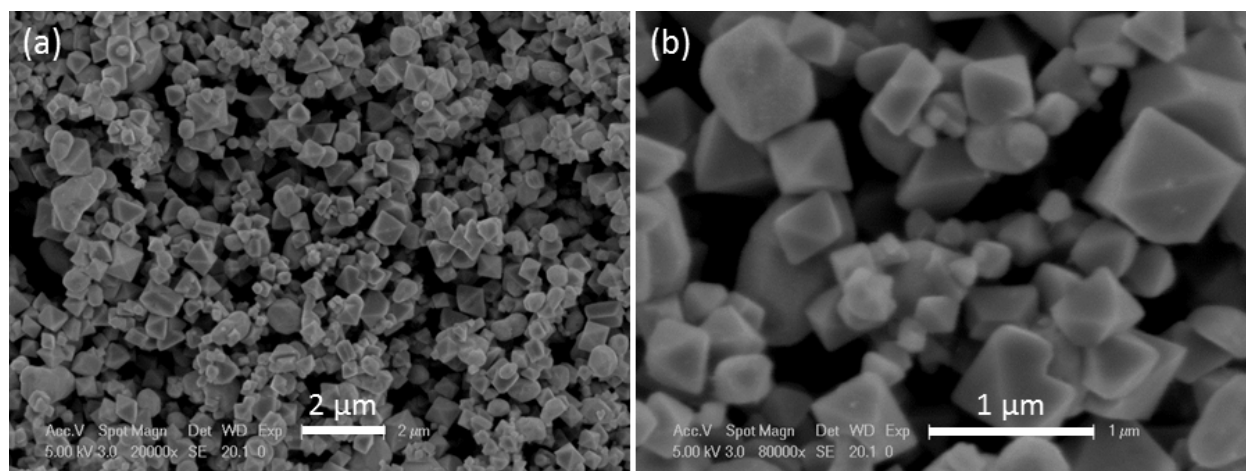

Fig. S2 SEM images of pure Cu-CuFe<sub>2</sub>O<sub>4</sub> crystals with different magnification.

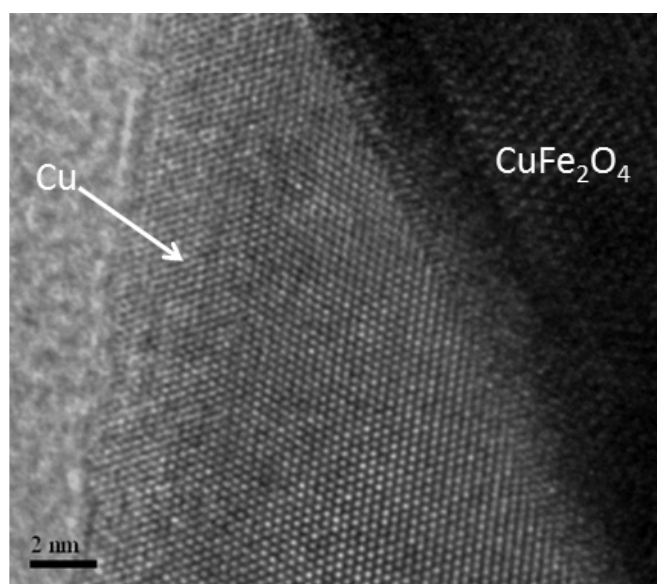

Fig. S3 HRTEM image of metallic Cu attached to the edge of CuFe<sub>2</sub>O<sub>4</sub> hexagonal platelet in the Cu-CuFe<sub>2</sub>O<sub>4</sub>/G composites.

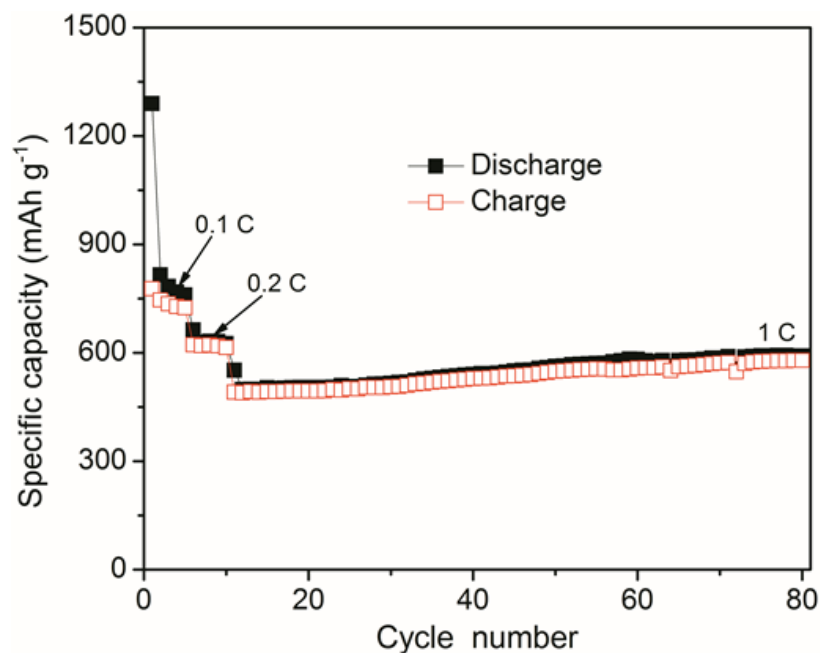

Fig. S4 Cycling performance of CuFe<sub>2</sub>O<sub>4</sub>/G composites at a current density of 1000 mA/g. (1C=1000 mA/g)

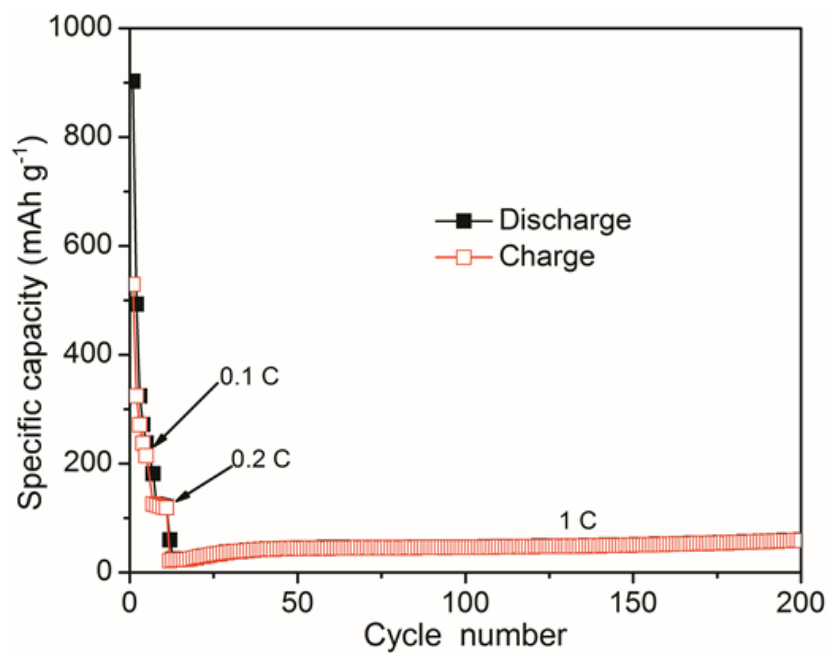

Fig. S5 Cyclic stability of pure Cu-CuFe<sub>2</sub>O<sub>4</sub> crystals at a current density of 1000 mA/g. (1C=1000 mA/g)
